# Supplementary material for: Odours of cancerous mouse congeners: detection and attractiveness
Source: Oxford University Press journal article supplement (doi:10.1242/bio.059208), 2022-04-11
Supplement: bio059208supp.pdf [file bio059208supp.pdf]

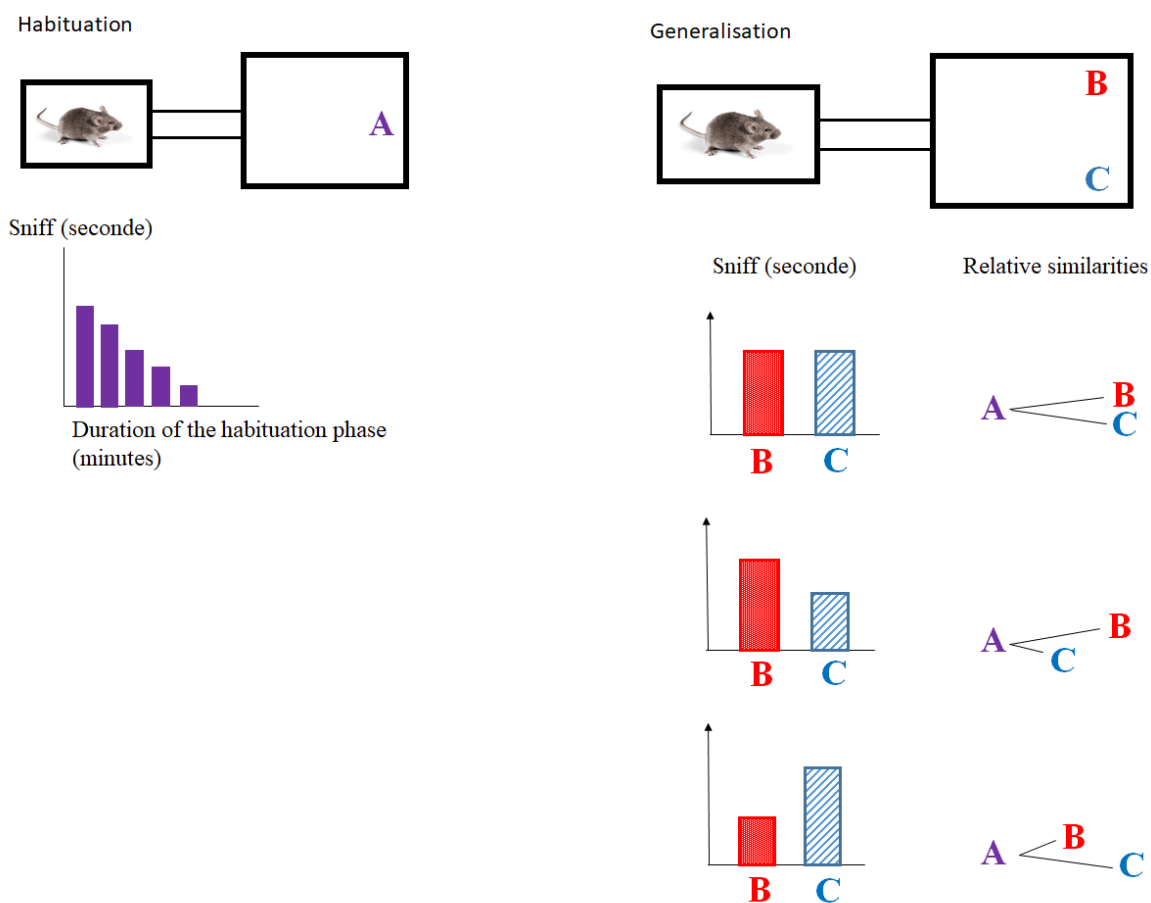

**Fig. S1. A scheme describing the habituation / generalisation procedure and predictions.** The generalisation phase follows the habituation phase only if the habituation phase is validated by a significant reduction of the time spent sniffing the habituation stimulus at the end of that phase. The generalisation phase allows evaluating relative similarities between the habituation stimulus and the two stimuli presented to the mouse during this phase.

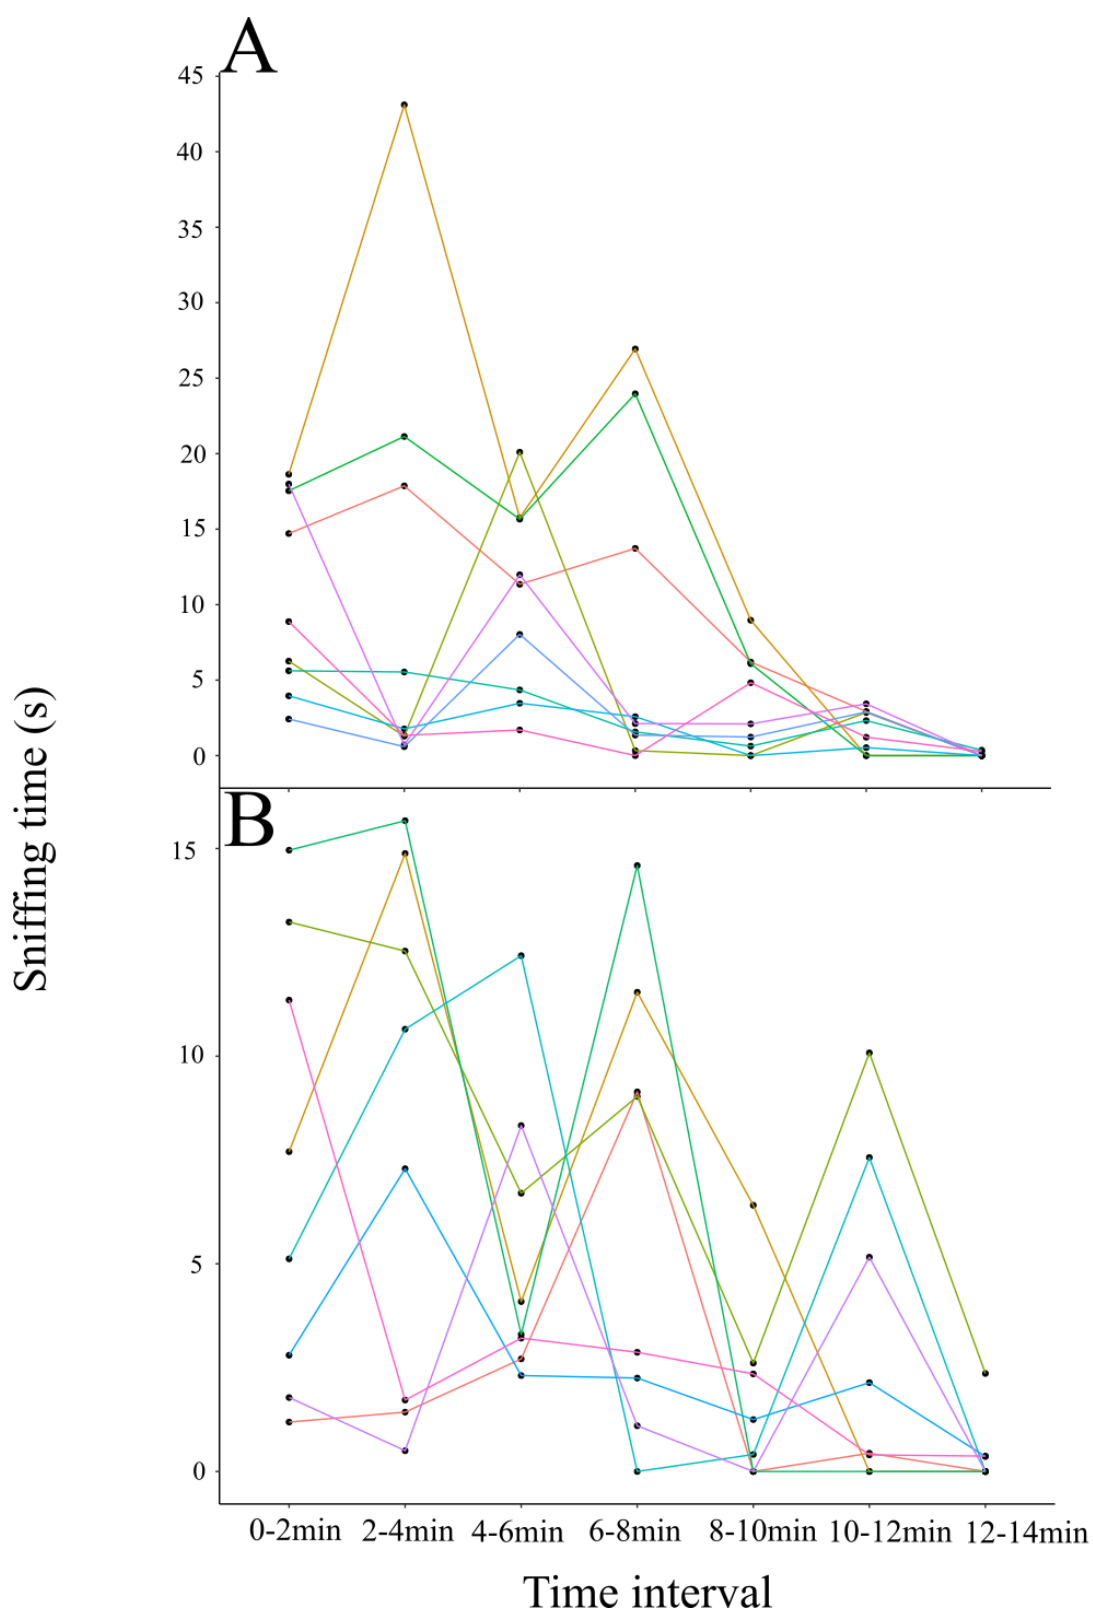

**Fig. S2.** Time spent by the mice sniffing the stimulus during the habituation phase for A) preliminary test 1 with  $n = 9$  and B) preliminary test 2 with  $n = 8$

**Fig S3 : Time spent by the mice sniffing the stimulus during the habituation phase for T0 A) series 1 with n =11 and B ) series 2 with n = 10, for T2 C) series 1 with n = 12 and D) series 2 with n = 11 and for T12, for E) series 1 with n = 16 and F) series 2 with n = 12.**

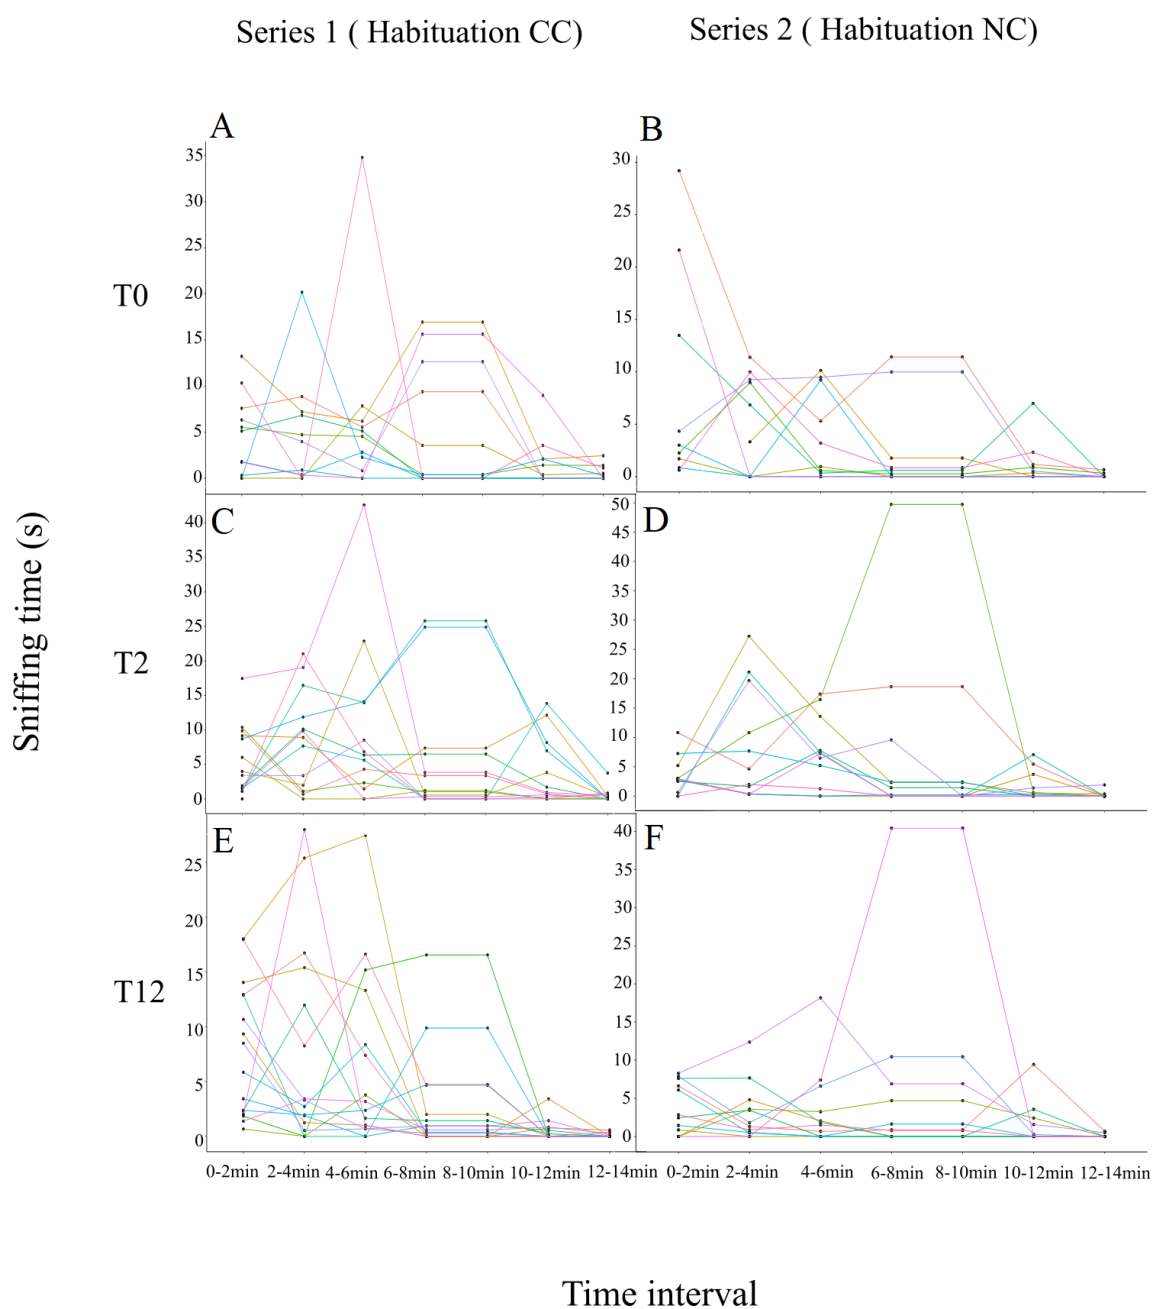

**Fig. S3. Time spent by the mice sniffing the stimulus during the habituation phase for T0 A)series 1 with n =11 and B ) series 2 with n = 10, for T2 C) series 1 with n = 12 and D)series 2 with n = 11 and for T12, for E) series 1 with n = 16 and F) series 2 with n = 12.**

**Table S1. Identification of the 21 compounds, and their occurrence in the different stimuli used during the behavioural tests for NC (non-cancerous) and CC (cancerous) mice at the three experimental conditions (T0, T2 and T12). Retention indices (RI), retention times (RT).**

| Compound                                       | RT    | RI   | NC  |     |     | CC  |     |     |
|------------------------------------------------|-------|------|-----|-----|-----|-----|-----|-----|
|                                                |       |      | T0  | T2  | T12 | T0  | T2  | T12 |
| Unknown compound 1                             | 2.14  | n.c  | 0   | 7/9 | 9/9 | 0   | 9/9 | 9/9 |
| propan-2-ol                                    | 2.23  | n.c  | 9/9 | 9/9 | 9/9 | 9/9 | 9/9 | 9/9 |
| propanoic acid                                 | 4.31  | 707  | 9/9 | 9/9 | 9/9 | 9/9 | 9/9 | 9/9 |
| 3-methyl-butan-1-ol                            | 4.89  | 733  | 3/9 | 8/9 | 9/9 | 8/9 | 9/9 | 9/9 |
| butanoic acid                                  | 6.47  | 802  | 9/9 | 9/9 | 9/9 | 9/9 | 9/9 | 9/9 |
| (x)-2-ethyl-hex-2-enal <sup>TI</sup>           | 6.68  | 809  | 0   | 9/9 | 9/9 | 9/9 | 9/9 | 9/9 |
| Unknown compound 2 *                           | 7.57  | 839  | 6/9 | 2/9 | 3/9 | 6/9 | 1/9 | 0/9 |
| 3-methylbutanoic acid                          | 7.98  | 853  | 9/9 | 8/9 | 9/9 | 9/9 | 9/9 | 9/9 |
| 2-methylbutanoic acid                          | 8.26  | 862  | 9/9 | 9/9 | 9/9 | 9/9 | 9/9 | 9/9 |
| hexan-1-ol                                     | 8.45  | 869  | 9/9 | 9/9 | 9/9 | 9/9 | 9/9 | 9/9 |
| (x)-2,4,4-trimethyl-pent-2-enal* <sup>TI</sup> | 8.59  | 873  | 9/9 | 9/9 | 0   | 0   | 0   | 0   |
| benzaldehyde                                   | 11.19 | 956  | 9/9 | 8/9 | 9/9 | 9/9 | 6/9 | 9/9 |
| 2,3-dehydro-exo-brevicomine                    | 13.80 | 1039 | 9/9 | 9/9 | 9/9 | 9/9 | 9/9 | 9/9 |
| 3,4-dehydro-exo-brevicomine                    | 14.06 | 1047 | 9/9 | 9/9 | 9/9 | 9/9 | 9/9 | 9/9 |
| fenchone                                       | 15.36 | 1089 | 9/9 | 9/9 | 9/9 | 9/9 | 0   | 9/9 |
| 2-sec-butyl-4,5-dihydrothiazole                | 15.82 | 1103 | 9/9 | 9/9 | 9/9 | 9/9 | 9/9 | 9/9 |
| nopinone                                       | 16.79 | 1135 | 9/9 | 9/9 | 8/9 | 9/9 | 8/9 | 9/9 |
| camphor                                        | 17.06 | 1144 | 9/9 | 9/9 | 9/9 | 9/9 | 9/9 | 9/9 |
| camphene hydrate                               | 17.25 | 1150 | 9/9 | 9/9 | 9/9 | 9/9 | 9/9 | 9/9 |
| (E)-3-pinocamphone                             | 17.53 | 1160 | 9/9 | 9/9 | 9/9 | 9/9 | 1/9 | 9/9 |
| 3,6,6-trimethyl-2-norpinanone* <sup>TI</sup>   | 18.89 | 1205 | 8/9 | 7/9 | 6/9 | 0   | 0   | 9/9 |

\* Compounds were removed from the subsequent statistical analyses because of their very low concentration (less than 1% of the mixture), and of uncertainty about their identification.

n.c : not calculated

TI : attempt of identification; in some cases CC, the configuration could not be determined.
